# Supplementary material for: Associations of Feeding Practices in Early Life and Dietary Intake at School Age with Obesity in 10- to 12-Year-Old Arab Children
Source: MDPI journal article supplement (doi:10.3390/nu13062106), 2021-06-19
Supplement: s1 [file nutrients-1233797-supplementary.pdf › nutrients-1233797-supplementary.pdf]

**Supplementary table S1: Baseline characteristics of the study sample according to village of residence**

|                                                   | Higher SES<br>village-A | Lower SES<br>village-B | P value <sup>a</sup> |
|---------------------------------------------------|-------------------------|------------------------|----------------------|
| <b>Total</b>                                      | 64                      | 110                    |                      |
| <b>Gender</b>                                     |                         |                        | 0.7                  |
| Boys                                              | 35 (55%)                | 64 (58%)               |                      |
| Girls                                             | 29 (45%)                | 46 (42%)               |                      |
| <b>Age of introduction of solid food</b>          |                         |                        | 0.003                |
| Age ≤4 months                                     | 34 (53%)                | 33 (30%)               |                      |
| Age >4 months                                     | 30 (47%)                | 77 (70%)               |                      |
| <b>Breastfeeding duration</b>                     |                         |                        | 0.2                  |
| No breastfeeding                                  | 0 (0.0%)                | 2 (2%)                 |                      |
| Breastfeeding <1 month                            | 2 (3%)                  | 5 (4%)                 |                      |
| 1-3 months                                        | 17 (27%)                | 30 (27%)               |                      |
| 3.1-6 months                                      | 11 (17%)                | 34 (31%)               |                      |
| 6.1-12 months                                     | 21 (33%)                | 23 (21%)               |                      |
| >12 months                                        | 13 (20%)                | 16 (15%)               |                      |
| <b>HAZ score at age 10-14 months, mean (SD)</b>   | 0.24 (1.09)             | -0.31 (1.07)           | 0.002 <sup>b</sup>   |
| <b>WHZ score at age 10-14 months, mean (SD)</b>   | 0.62 (1.02)             | 0.86 (1.19)            | 0.2 <sup>b</sup>     |
| <b>Birth weight, g, mean (SD)</b>                 | 3184 (466)              | 3331 (422)             | 0.034 <sup>b</sup>   |
| <b>Gestational age at birth, mean (SD), weeks</b> | 39.3 (1.4)              | 38.9 (1.3)             | 0.10 <sup>b</sup>    |

P value by the <sup>a</sup> Chi square test unless specified otherwise; <sup>b</sup> Student's *t* test. <sup>c</sup> Household crowding index: the number of persons living in the household divided by the number of rooms in the household. HAZ: height for age Z score; g: gram; SD: standard deviation; SES: socioeconomic status; WHZ: weight for height Z score.

**Supplementary table S2: Correlates of obesity among children aged 10-12 years – model 2**

|                                        | Adjusted OR (95% CI) | P value |
|----------------------------------------|----------------------|---------|
| <b>Daily energy intake</b>             |                      |         |
| Tertile 1 ( $\leq 1462.0$ )            | Reference            |         |
| Tertile 2 (1462.1-1961.6)              | 0.80 (0.22-2.84)     | 0.7     |
| Tertile 3 ( $> 1961.6$ )               | 0.52 (0.10-2.60)     | 0.4     |
| <b>Daily total dietary fat intake</b>  |                      |         |
| Tertile 1 ( $\leq 46.6$ )              | Reference            |         |
| Tertile 2 (46.7-67.8)                  | 3.88 (1.11-13.5)     | 0.034   |
| Tertile 3 ( $> 67.8$ )                 | 5.55 (1.11-27.6)     | 0.036   |
| <b>Gestational age at birth, weeks</b> | 0.69 (0.50-0.94)     | 0.021   |
| <b>WHZ score at age 10-14 months</b>   | 1.77 (1.21-2.58)     | 0.003   |
| <b>SES composite score</b>             | 0.68 (0.38-1.21)     | 0.2     |

CI: confidence interval; OR: odds ratio; SES: socioeconomic status; WHZ: weight for height Z score. Included in the multivariable model 135 children (58 with obesity). P value from multivariable logistic regression model.

**Supplementary table S3: Associations of sociodemographic characteristics and early-life exposures with obesity among children aged 10-12 years, by village**

|                                                   | Higher SES village-A |                     |         | Lower SES village-B |                     |         |
|---------------------------------------------------|----------------------|---------------------|---------|---------------------|---------------------|---------|
|                                                   | BMIZ=<2, n=40        | BMIZ>2 (obese) n=18 | P value | BMIZ=<2, n=46       | BMIZ>2 (obese) n=45 | P value |
| <b>WHZ score at age 10-14 months, mean (SD)</b>   | 0.32 (0.84)          | 1.03 (1.00)         | 0.011   | 0.52 (1.13)         | 1.11 (1.26)         | 0.026   |
| <b>Age of introduction of solid food</b>          |                      |                     | 0.2     |                     |                     | 0.9     |
| Age ≤4 months                                     | 24 (60%)             | 8 (44%)             |         | 15 (33%)            | 15 (33%)            |         |
| Age >4 months                                     | 16 (40%)             | 10 (56%)            |         | 31 (67%)            | 30 (67%)            |         |
| <b>Gestational age at birth</b>                   |                      |                     | 1.0     |                     |                     | 0.2     |
| 34-36 weeks                                       | 2 (5%)               | 0 (0%)              |         | 3 (7%)              | 1 (2%)              |         |
| 37-42 weeks                                       | 38 (95%)             | 18 (100%)           |         | 42 (93%)            | 45 (98%)            |         |
| <b>Gestational age at birth, mean (SD), weeks</b> | 39.6 (1.6)           | 39.0 (1.1)          | 0.19    | 39.2 (1.2)          | 38.8 (1.3)          | 0.15    |
| <b>Birth weight, g</b>                            |                      |                     | 0.9     |                     |                     | 0.7     |
| 2000-2500                                         | 4 (10%)              | 1 (5%)              |         | 1 (2%)              | 2 (5%)              |         |
| 2501-3000                                         | 12 (30%)             | 7 (39%)             |         | 8 (17%)             | 7 (16%)             |         |
| 3001-3500                                         | 13 (33%)             | 5 (28%)             |         | 24 (52%)            | 19 (43%)            |         |
| 3501-4500                                         | 11 (28%)             | 5 (28%)             |         | 13 (29%)            | 16 (36%)            |         |
| <b>Birth weight, g, mean (SD)</b>                 | 3146 (499)           | 3213 (389)          | 0.6     | 3361 (410)          | 3323 (430)          |         |
| <b>Breastfeeding duration</b>                     |                      |                     | 0.9     |                     |                     | 0.4     |
| No breastfeeding                                  | 0 (0%)               | 0 (0%)              |         | 2 (4%)              | 0 (0%)              |         |
| Breastfeeding <1 month                            | 1 (3%)               | 0 (0%)              |         | 4 (9%)              | 1 (2%)              |         |
| 1-3 months                                        | 11 (28%)             | 5 (28%)             |         | 14 (30%)            | 14 (31%)            |         |
| 3.1-6 months                                      | 7 (17%)              | 4 (22%)             |         | 12 (27%)            | 15 (34%)            |         |
| 6.1-12 months                                     | 13 (33%)             | 6 (33%)             |         | 7 (15%)             | 10 (22%)            |         |
| >12 months                                        | 8 (20%)              | 3 (167%)            |         | 7 (15%)             | 5 (11%)             |         |
| <b>Breastfeeding duration, months, mean (SD)</b>  | 7.8 (5.4)            | 7.7 (5.6)           | 0.9     | 5.8 (5.4)           | 6.2 (4.8)           | 0.6     |

BMIZ: Body mass index Z score; SD: standard deviation; SES: socioeconomic status; WHZ: weight for height Z score. P values were obtained by the chi square test. Household crowding index: the number of persons living in the household divided by the number of rooms in the household. Interactions between each of the independent variables and village of residence were assessed in separate logistic regression models that each included: village, the independent variable of interest and an interaction term between them, while obesity was the dependent variable. No significant interactions ( $P>0.2$ ) were found between village of residence and any of the independent variables.

**Supplementary table S4: Associations of dietary intake with obesity among children aged 10-12 years, by village**

|                                | Higher SES village-A |                     |         | Lower SES village-B |                     |         |
|--------------------------------|----------------------|---------------------|---------|---------------------|---------------------|---------|
|                                | BMIZ=<2, n=40        | BMIZ>2 (obese) n=18 | P value | BMIZ=<2, n=46       | BMIZ>2 (obese) n=45 | P value |
| <b>Energy intake , kcal</b>    |                      |                     | 0.10    |                     |                     | 0.9     |
| Tertile 1 (≤1462.0)            | 18 (45%)             | 3 (17%)             |         | 14 (30%)            | 13 (29%)            |         |
| Tertile 2 (1462.1-1961.6)      | 12 (30%)             | 9 (50%)             |         | 14 (31%)            | 15 (33%)            |         |
| Tertile 3 (>1961.6)            | 10 (25%)             | 6 (33%)             |         | 18 (39%)            | 17 (38%)            |         |
| <b>Protein intake, g</b>       |                      |                     | 0.013   |                     |                     | 0.2     |
| Tertile 1 (≤51.6)              | 21 (52%)             | 3 (17%)             |         | 13 (28%)            | 11 (25%)            |         |
| Tertile 2 (51.7-79.9)          | 12 (30%)             | 6 (33%)             |         | 13 (28%)            | 20 (44%)            |         |
| Tertile 3 (>79.9)              | 7 (18%)              | 9 (50%)             |         | 20 (44%)            | 14 (31%)            |         |
| <b>Total fat intake, g</b>     |                      |                     | 0.2     |                     |                     | 0.4     |
| Tertile 1 (≤46.6)              | 20 (50%)             | 5 (28%)             |         | 16 (35%)            | 10 (22%)            |         |
| Tertile 2 (46.6-67.8)          | 11 (27%)             | 7 (39%)             |         | 14 (30%)            | 17 (38%)            |         |
| Tertile 3 (>67.8)              | 9 (23%)              | 6 (33%)             |         | 16 (35%)            | 18 (40%)            |         |
| <b>Carbohydrates intake, g</b> |                      |                     | 0.7     |                     |                     | 0.2     |
| Tertile 1 (≤185.5)             | 15 (38%)             | 5 (28%)             |         | 16 (35%)            | 12 (27%)            |         |
| Tertile (185.6-254.2)          | 14 (35%)             | 7 (39%)             |         | 11 (24%)            | 18 (40%)            |         |
| Tertile 3 (>254.2)             | 11 (27%)             | 6 (33%)             |         | 19 (41%)            | 15 (33%)            |         |
| <b>Fiber intake, g</b>         |                      |                     | 0.8     |                     |                     | 0.6     |
| Tertile 1 (≤12.98)             | 15 (38%)             | 8 (45%)             |         | 12 (26%)            | 16 (36%)            |         |
| Tertile 2 (12.99-20.3)         | 14 (35%)             | 6 (33%)             |         | 16 (35%)            | 13 (29%)            |         |
| Tertile 3 (>20.3)              | 11 (27%)             | 4 (22%)             |         | 18 (39%)            | 16 (35%)            |         |
| <b>Cholesterol, mg</b>         |                      |                     | 0.012   |                     |                     | 0.5     |
| Tertile 1 (≤117.8)             | 18 (45%)             | 3 (17%)             |         | 14 (31%)            | 13 (29%)            |         |
| Tertile 2 (117.9-239.8)        | 16 (40%)             | 6 (33%)             |         | 13 (28%)            | 17 (38%)            |         |
| Tertile 3 (>239.8)             | 6 (15%)              | 9 (50%)             |         | 19 (41%)            | 15 (33%)            |         |
| <b>Saturated fat intake, g</b> |                      |                     | 0.065   |                     |                     | 0.3     |
| Tertile 1 (≤15.0)              | 21 (52%)             | 4 (22%)             |         | 12 (26%)            | 11 (24%)            |         |
| Tertile 2 (15.01-21.9)         | 8 (20%)              | 8 (45%)             |         | 20 (44%)            | 14 (31%)            |         |
| Tertile 3 (>21.9)              | 11 (28%)             | 6 (33%)             |         | 14 (30%)            | 20 (45%)            |         |
| <b>Monounsaturated fat, g</b>  |                      |                     | 0.2     |                     |                     | 0.7     |
| Tertile 1 (≤16.81)             | 20 (50%)             | 5 (28%)             |         | 13 (28%)            | 11 (25%)            |         |
| Tertile 2 (16.82-24.8)         | 11 (28%)             | 6 (33%)             |         | 17 (37%)            | 20 (44%)            |         |
| Tertile 3 (>24.9)              | 9 (22%)              | 7 (39%)             |         | 16 (35%)            | 14 (31%)            |         |
| <b>Polyunsaturated fat, g</b>  |                      |                     | 0.5     |                     |                     |         |
| Tertile 1 (≤6.5)               | 30 (75%)             | 15 (83%)            |         | 2 (4%)              | 4 (9%)              | 0.6     |
| Tertile 2 (6.6-15.1)           | 8 (20%)              | 3 (17%)             |         | 20 (44%)            | 20 (44%)            |         |
| Tertile 3 (>15.1)              | 2 (5%)               | 0 (0%)              |         | 24 (52%)            | 21 (47%)            |         |
| <b>Trans fatty acids</b>       |                      |                     | 0.13    |                     |                     | 0.006   |
| 0                              | 18 (45%)             | 6 (33%)             |         | 34 (74%)            | 26 (58%)            |         |
| 1-2                            | 1 (3%)               | 3 (17%)             |         | 7 (15%)             | 2 (4%)              |         |
| 3+                             | 21 (52%)             | 9 (5%)              |         | 5 (11%)             | 17 (38%)            |         |

BMIZ: Body mass index Z score; SES: socioeconomic status. P values were obtained by the chi square test. Interactions between each of the independent variables and village of residence were assessed in separate logistic regression models that each included: total energy intake, village, each macronutrient/fatty acids of interest, and an interaction term between the variables, village and macronutrient/fatty acid, while obesity was the dependent variable. Significant interactions were found between village of residence and intake of protein ( $p=0.031$ ), cholesterol ( $p=0.032$ ), saturated fat ( $p=0.068$ ) and trans fatty acids ( $p=0.006$ ). No significant interactions ( $P>0.2$ ) were found between village of residence and intake of fiber, fat, carbohydrates, monounsaturated fat or polyunsaturated fat.

**Supplementary table S5: Energy-adjusted associations of intakes of protein, cholesterol, and trans fatty acids with obesity, by village of residence**

|                            | Higher SES village-A |         | Lower SES village-B  |         |
|----------------------------|----------------------|---------|----------------------|---------|
|                            | Adjusted OR (95% CI) | P value | Adjusted OR (95% CI) | P value |
| <b>Protein intake, g</b>   |                      | 0.079   |                      | 0.2     |
| Tertile 1 ( $\leq 51.6$ )  | Reference            |         | Reference            |         |
| Tertile 2 (51.7-79.9)      | 2.98 (0.51-17.42)    | 0.2     | 1.69 (0.56-5.06)     | 0.3     |
| Tertile 3 ( $>79.9$ )      | 8.81 (1.28-60.39)    | 0.027   | 0.64 (0.17-2.44)     | 0.5     |
| <b>Cholesterol, mg</b>     |                      | 0.066   |                      | 0.6     |
| Tertile 1 ( $\leq 117.8$ ) | Reference            |         | Reference            |         |
| Tertile 2 (117.9-239.8)    | 3.12 (0.43-10.48)    | 0.3     | 1.37 (0.47-3.96)     | 0.5     |
| Tertile 3 ( $>239.8$ )     | 7.94 (1.31-47.89)    | 0.024   | 0.81 (0.27-2.41)     | 0.7     |
| <b>Trans fatty acids</b>   |                      | 0.058   |                      | 0.009   |
| 0                          | Reference            |         | Reference            |         |
| 1-2                        | 35.88 (1.68-763.82)  | 0.022   | 0.37 (0.07-1.99)     | 0.2     |
| 3+                         | 0.83 (0.22-3.14)     | 0.78    | 4.76 (1.49-15.12)    | 0.008   |

CI: confidence interval; OR: odds ratio; SES: socioeconomic status. Each logistic regression model was adjusted for daily energy intake

**Supplementary table S6: Associations of dietary intake, as percent calories from total daily energy, with obesity among children aged 10-12 years, by village**

|                                                  | <b>Higher SES village-A</b> |                     |         | <b>Lower SES village-B</b> |                     |         | <b>Total</b> |                     |         |
|--------------------------------------------------|-----------------------------|---------------------|---------|----------------------------|---------------------|---------|--------------|---------------------|---------|
|                                                  | BMIZ=<2 n=40                | BMIZ>2 (obese) n=18 | P value | BMIZ=<2 n=46               | BMIZ>2 (obese) n=45 | P value | BMIZ=<2 n=86 | BMIZ>2 (obese) n=63 | P value |
| <b>Percent calories from fat</b>                 |                             |                     | 0.5     |                            |                     | 0.8     |              |                     | 0.4     |
| Tertile 1                                        | 19 (47%)                    | 7 (39%)             |         | 15 (33%)                   | 12 (27%)            |         | 34 (40%)     | 19 (30%)            |         |
| Tertile 2                                        | 13 (33%)                    | 5 (28%)             |         | 15 (33%)                   | 16 (35%)            |         | 28 (32%)     | 21 (33%)            |         |
| Tertile 3                                        | 8 (20%)                     | 6 (33%)             |         | 16 (34%)                   | 17 (38%)            |         | 24 (28%)     | 23 (37%)            |         |
| <b>Percent calories from carbohydrates</b>       |                             |                     | 0.5     |                            |                     | 0.8     |              |                     | 0.4     |
| Tertile 1                                        | 8 (20%)                     | 8 (44%)             |         | 16 (35%)                   | 15 (33%)            |         | 24 (28%)     | 23 (37%)            |         |
| Tertile 2                                        | 12 (30%)                    | 5 (28%)             |         | 17 (37%)                   | 16 (36%)            |         | 29 (34%)     | 21 (33%)            |         |
| Tertile 3                                        | 20 (50%)                    | 5 (28%)             |         | 13 (28%)                   | 14 (31%)            |         | 33 (38%)     | 19 (30%)            |         |
| <b>Percent calories from protein</b>             |                             |                     | 0.12    |                            |                     | 0.9     |              |                     | 0.4     |
| Tertile 1                                        | 16 (40%)                    | 3 (17%)             |         | 13 (28%)                   | 17 (38%)            |         | 29 (34%)     | 20 (32%)            |         |
| Tertile 2                                        | 15 (38%)                    | 7 (39%)             |         | 14 (31%)                   | 12 (27%)            |         | 29 (34%)     | 19 (30%)            |         |
| Tertile 3                                        | 9 (22%)                     | 8 (44%)             |         | 19 (41%)                   | 16 (35%)            |         | 28 (32%)     | 24 (38%)            |         |
| <b>Percent calories from saturated fat</b>       |                             |                     | 0.7     |                            |                     | 0.19    |              |                     | 0.11    |
| Tertile 1                                        | 19 (47%)                    | 7 (39%)             |         | 17 (37%)                   | 9 (20%)             |         | 36 (42%)     | 16 (25%)            |         |
| Tertile 2                                        | 11 (28%)                    | 5 (28%)             |         | 15 (33%)                   | 20 (44%)            |         | 26 (30%)     | 25 (40%)            |         |
| Tertile 3                                        | 10 (25%)                    | 6 (33%)             |         | 14 (30%)                   | 16 (36%)            |         | 24 (28%)     | 22 (35%)            |         |
| <b>Percent calories from monounsaturated fat</b> |                             |                     | 0.07    |                            |                     | 0.4     |              |                     | 0.08    |
| Tertile 1                                        | 13 (33%)                    | 7 (39%)             |         | 13 (28%)                   | 17 (38%)            |         | 26 (30%)     | 24 (38%)            |         |
| Tertile 2                                        | 16 (40%)                    | 2 (11%)             |         | 18 (39%)                   | 12 (27%)            |         | 34 (40%)     | 14 (22%)            |         |
| Tertile 3                                        | 11 (27%)                    | 9 (50%)             |         | 15 (33%)                   | 16 (35%)            |         | 26 (30%)     | 25 (40%)            |         |
| <b>Percent calories from polyunsaturated fat</b> |                             |                     | 0.4     |                            |                     | 0.8     |              |                     | 0.3     |
| Tertile 1                                        | 31 (77%)                    | 16 (89%)            |         | 2 (4%)                     | 1 (2%)              |         | 33 (38%)     | 17 (27%)            |         |
| Tertile 2                                        | 7 (18%)                     | 2 (11%)             |         | 21 (46%)                   | 22 (49%)            |         | 28 (33%)     | 24 (38%)            |         |
| Tertile 3                                        | 2 (5%)                      | 0 (0%)              |         | 23 (50%)                   | 22 (49%)            |         | 25 (29%)     | 22 (35%)            |         |

BMIZ: Body mass index Z score; SES: socioeconomic status. P value was obtained by the chi square test.
